# Supplementary material
Source: publisher figshare collection journal article supplement (https://frontiersin.figshare.com/ndownloader/files/30967144)
Supplement: Supplementary file 1 [file 30967144]

**Table S1 Water quality index criteria and water quality index of selected HAL sites**

| WQI | 0-50 | 50-100 | 100-200 | 200-300 | >300 |
| --- | --- | --- | --- | --- | --- |
| Water quality | Excellent | Very good | Poor water | Very poor water | Water unsuitable for drinking |
| Gangbal lake | 32.83 | - | - | - | - |
| Gangbal stream | 30.94 | - | - | - | - |
| Nundkul lake | 31.50 | - | - | - | - |
| Nundkul stream I | 31.76 | - | - | - | - |
| Nundkulstream II | 33.23 | - | - | - | - |
| Gadsar lake | 31.75 | - | - | - | - |
| Gadsar stream I | 30.23 | - | - | - | - |
| Gadsar stream II | 31.96 | - | - | - | - |
| Kishansar lake | 27.94 | - | - | - | - |
| Kishansar stream | 27.42 | - | - | - | - |
| Vishansar lake | 30.94 | - | - | - | - |
| Vishansar stream I | 30.70 | - | - | - | - |
| Vishansar stream II | 30.67 | - | - | - | - |

**Table S2 Wilk’s λ quotient** of physicochemical characteristics of HAL sites

| Tests of Equality of Group Means | | | | | |
| --- | --- | --- | --- | --- | --- |
|  | Wilks' Lambda | F | df1 | df2 | Sig. |
| pH | .957 | .227 | 2 | 10 | .801 |
| Cond | .583 | 3.579 | 2 | 10 | .067 |
| DO | .997 | .017 | 2 | 10 | .983 |
| TDS | .544 | 4.199 | 2 | 10 | .047 |
| TA | .857 | .834 | 2 | 10 | .463 |
| Cl | .889 | .625 | 2 | 10 | .555 |
| TH | .787 | 1.356 | 2 | 10 | .301 |
| Ca-H | .765 | 1.538 | 2 | 10 | .262 |
| Mg-H | .242 | 15.666 | 2 | 10 | .001 |
| NO3-N | .178 | 23.111 | 2 | 10 | .000 |
| NO2-N | .319 | 10.672 | 2 | 10 | .003 |
| NH3-N | .108 | 41.442 | 2 | 10 | .000 |
| TP | .330 | 10.167 | 2 | 10 | .004 |
| Ortho-P | .406 | 7.300 | 2 | 10 | .011 |
| SO4 | .975 | .128 | 2 | 10 | .881 |
| Dsi | .964 | .189 | 2 | 10 | .831 |
| Vel | .987 | .066 | 2 | 10 | .936 |
| Disch | .864 | .788 | 2 | 10 | .481 |
| Wtemp | .605 | 3.266 | 2 | 10 | .081 |

**Table S3 Phytoplankton composition at different HAL’s of Kashmir Himalaya**

| TAXA | GL | NL | GSL | VL | KL |
| --- | --- | --- | --- | --- | --- |
| Bacillariophyceae | | | | | |
| *Amphora* sp. | + | + | + | + | + |
| *Cymbella* sp. | + | + | + | + | + |
| *Cymbella aspera* | + | + | + | + | + |
| *Cymbella kappi* | + | + | + | + | + |
| *Cymbella tumida* | + | + | + | + | + |
| *Cymbella ventricosa* | ­­- | + | + | + | + |
| *Desmidium* sp. | - | - | + | + | - |
| *Diatoma* sp. | + | + | + | + | + |
| Didymosphenia sp. | + | + | + | + | + |
| *Epithemia* sp*.* | + | + | + | + | + |
| *Fragilaria* sp. | + | + | + | + | + |
| *Fragilariforma* sp. | - | - | + | + | + |
| *Frustulia* sp. | + | + | + | + | + |
| *Gomphonema truncatum* | + | + | + | + | + |
| *Gomphonies* sp. | + | + | + | + | + |
| Hannaea arcus | - | - | + | + | + |
| *Meridion* sp. | + | + | + | + | - |
| *Navicula* sp. | + | + | + | + | + |
| *Navicula cryptocephala* | - | - | - | + | + |
| *Navicula lanceolata* | + | + | + | - | - |
| *Navicula marglithi* | + | + | + | - | + |
| *Navicula radiosa* | + | + | + | + | - |
| *Nitzschia* sp. | + | + | + | - | - |
| Nitzschia gracilis | + | + | + | - | - |
| *Synedra* sp. | + | + | + | + | + |
| *Synedra ulna* | + | + | + | + | + |
| *Tabellaria* sp. | + | + | + | + | + |
| *Pinnularia* sp. | + | + | + | + | + |
| *Cyclotella* sp. | + | + | + | + | + |
| Cocconeis sp. | + | + | + | - | + |
| *Surirella* sp. | + | + | + | + | - |
| Chlorophyceae | | | | | |
| *Chlorella* sp. | - | - | + | + | + |
| *Chlorococcum* sp. | + | + | + | + | + |
| *Closterium* sp. | + | - | + | + | + |
| Cylindrocaspa sp. | - | - | - | + | - |
| *Maugoetia* sp. | - | - | + | + | + |
| *Oedogonium* sp. | + | + | + | + | - |
| *Spirogyra* sp. | + | + | + | + | + |
| *Staurastrum* sp. | + | + | + | + | + |
| *Ulothrix* sp. | + | + | - | - | + |
| *Zygnema* sp. | + | + | - | + | + |
| Cyanophyceae | | | | | |
| *Spirulina* sp. | + | + | + | + | + |
| Xanthophyceae | | | | | |
| *Vaucheria* sp. | - | - | + | + | + |

**Table S4 Periphytic algal composition at different stream sites of HAL’s of Kashmir Himalaya**

|  | GS | NK 1 | NK 2 | GS 1 | GS 2 | KS | VS 1 | VS2 |
| --- | --- | --- | --- | --- | --- | --- | --- | --- |
| Bacilarophyceae | | | | | | | | |
| Achnanthidium sp. | ˗ | + | ˗ | + | ˗ | + | ˗ | ˗ |
| *Achnanthes* sp. | ˗ | ˗ | ˗ | + | + | + | + | + |
| *Amphipleura* sp. | + | + | + | ˗ | ˗ | ˗ | + | + |
| *Amphora* sp. | + | + | + | + | + | + | + | + |
| *Bacillaria paradoxa* | ˗ | + | + | + | + | ˗ | + | + |
| *Bacillaria* sp. | ˗ | ˗ | + | + | + | + | ˗ | ˗ |
| *Cymbella aspera* | + | + | + | + | + | + | + | + |
| *Cymbella kappi* | + | + | + | + | + | + | + | + |
| *Cymbella* sp. | + | + | + | + | + | + | + | + |
| *Diatoma* sp. | + | + | + | + | + | + | + | + |
| *Diatomella* sp. | + | + | + | + | + | + | + | + |
| *Encyonema* sp. | + | + | + | + | + | + | + | + |
| *Epithemia* sp. | + | + | + | + | + | - | + | + |
| *Eunotia* sp. | + | + | + | ˗ | ˗ | ˗ | + | + |
| *Fragilariforma* sp. | ˗ | ˗ | ˗ | ˗ | ˗ | ˗ | + | + |
| Fragilaria capucina | ˗ | ˗ | ˗ | ˗ | + | + | + | + |
| *Fragilaria sp.* | + | + | + | ˗ | ˗ | + | ˗ | ˗ |
| *Frustulia* sp. | ˗ | ˗ | ˗ | + | + | + | + | + |
| *Ghomphonema* sp. | + | + | + | + | + | + | + | + |
| *Gomphonema minutum* | ˗ | + | + | + | + | + | + | + |
| *Gomphonies* sp. | + | + | + | + | + | + | ˗ | ˗ |
| *Navicula radiosa* | + | + | + | + | + | + | ˗ | + |
| *Navicula* sp*.* | + | + | + | + | + | + | + | + |
| *Neidium* sp. | ˗ | ˗ | ˗ | + | + | ˗ | ˗ | + |
| *Nitzschia* sp. | + | + | + | + | + | + | ˗ | ˗ |
| *Pinnularia* sp*.* | + | + | + | + | + | + | + | + |
| *Synedra* sp. | + | + | + | ˗ | ˗ | + | + | + |
| *Tabellaria* sp. | + | + | + | + | + | + | ˗ | ˗ |
| *Meridion* sp. | + | + | + | + | + | + | + | + |
| Hannaea arcus | + | + | + | ˗ | ˗ | + | + | + |
| Stauroneis sp. | ˗ | ˗ | ˗ | ˗ | ˗ | + | ˗ | ˗ |
| *Cyclotella* sp. | + | ˗ | ˗ | + | + | + | + | + |
| *Opephora* sp. | ˗ | ˗ | ˗ | + | + | + | + | + |
| Chlorophyceae | | | | | | | | |
| *Maugoteia* sp*.* | ˗ | ˗ | ˗ | + | ˗ | + | + | + |
| *Spirogyra* sp. | ˗ | + | + | + | + | + | ˗ | ˗ |
| *Zygnema* sp. | ˗ | + | + | + | + | ˗ | + | + |
| *Ulothrix* sp*.* | ˗ | ˗ | ˗ | + | + | ˗ | + | + |
| *Cladophora* sp. | + | + | + | + | + | + | + | + |
| *Cocconeis sp.* | ˗ | ˗ | ˗ | ˗ | ˗ | + | + | + |
| Scenedesmus sp. | ˗ | ˗ | ˗ | + | + | + | ˗ | ˗ |
| *Chlorella* sp*.* | - | + | + | ˗ | + | + | + | + |
| *Chlorococcum* sp. | + | + | + | + | + | + | + | + |
| Cylindrocaspa sp. | ˗ | ˗ | + | ˗ | ˗ | ˗ | + | + |
| *Cosmarium* sp. | ˗ | + | + | ˗ | ˗ | + | ˗ | ˗ |
| *Oedogonium sp.* | ˗ | + | ˗ | ˗ | ˗ | + | ˗ | ˗ |
|  |  | Xanthophyceae | | | |  |  |  |
| *Vaucheria* sp. | + | + | + | ˗ | + | + | + | + |
